# Supplementary material for: Impact of pretreatment on RO membrane organic fouling: composition and adhesion of tertiary wastewater effluent organic matter
Source: Royal Society of Chemistry journal article supplement (doi:10.1039/d0ew01098g), 2021-01-01
Supplement: d0ew01098g1.pdf [file d0ew01098g1.pdf]

# **Impact of pretreatment on RO membrane organic fouling: Composition and adhesion of tertiary wastewater effluent organic matter**

Nadine Siebdrath<sup>1,3</sup>, Bertram Skibinski<sup>2</sup>, Shiju Abraham<sup>1</sup>, Roy Bernstein<sup>1</sup>, Robert Berger<sup>1,3</sup>, Noa Stein<sup>1</sup>, Yair Kaufman<sup>1</sup>, André Lerch<sup>3\*</sup>, Moshe Herzberg<sup>1\*</sup>

<sup>1</sup> The Blaustein Institutes for Desert Research, Zuckerberg Institute for Water Research, Ben Gurion University of the Negev, Israel

<sup>2</sup> Chair of Urban Water Systems Engineering, Technische Universität München, Garching, Germany

<sup>3</sup> Institute of Urban and Industrial water management, Technische Universität Dresden, Germany

## **Supplementary material**

\*Corresponding authors: [andre.lerch@tu-dresden.de](mailto:andre.lerch@tu-dresden.de) (André Lerch), [herzberg@bgu.ac.il](mailto:herzberg@bgu.ac.il) (Moshe Herzberg)

## A) ICP analysis of the treated waste waters from Herzeliya WWTP

Table S1: ICP analysis of the treated waste waters from Herzeliya WWTP

| <b>Ion Type</b>                    | <b>TWW<br/>[mg L-1]</b> | <b>TWW+BF<br/>[mg L-1]</b> | <b>TWW+UF<br/>[mg L-1]</b> | <b>Average<br/>[mg L-1]</b> |
|------------------------------------|-------------------------|----------------------------|----------------------------|-----------------------------|
| <b>Al<sup>3+</sup></b>             | ND                      | ND                         | ND                         | ND                          |
| <b>B<sup>3+</sup></b>              | ND                      | ND                         | ND                         | ND                          |
| <b>Ba<sup>2+</sup></b>             | 0.09                    | 0.10                       | 0.10                       | 0.09 ± 0.01                 |
| <b>Ca<sup>2+</sup></b>             | 70.82                   | 70.65                      | 69.20                      | 70.23 ± 0.89                |
| <b>Cr<sup>3+</sup></b>             | ND                      | ND                         | ND                         | ND                          |
| <b>Cu<sup>2+</sup></b>             | ND                      | ND                         | ND                         | ND                          |
| <b>Fe<sup>2+</sup></b>             | ND                      | ND                         | ND                         | ND                          |
| <b>K<sup>+</sup></b>               | 22.37                   | 22.97                      | 22.32                      | 22.55 ± 0.36                |
| <b>Li<sup>+</sup></b>              | ND                      | ND                         | ND                         | ND                          |
| <b>Mg<sup>2+</sup></b>             | 17.22                   | 17.15                      | 16.80                      | 17.06 ± 0.22                |
| <b>Na<sup>+</sup></b>              | 118.77                  | 120.46                     | 117.09                     | 118.78 ± 1.68               |
| <b>P</b>                           | 1.75                    | 1.33                       | 1.71                       | 1.60 ± 0.23                 |
| <b>S</b>                           | 20.24                   | 21.01                      | 19.89                      | 20.38 ± 0.57                |
| <b>Si</b>                          | 6.81                    | 6.90                       | 6.71                       | 6.81 ± 0.10                 |
| <b>Sr<sup>2+</sup></b>             | 0.28                    | 0.28                       | 0.27                       | 0.28 ± 0.01                 |
| <b>Zn<sup>2+</sup></b>             | 0.02                    | 0.02                       | 0.03                       | 0.02 ± 0.01                 |
| <b>Cl<sup>-</sup></b>              | 158.00                  | 158.00                     | 162.50                     | 159.50 ± 2.60               |
| <b>NO<sub>3</sub><sup>-</sup></b>  | 21.00                   | 21.50                      | 20.50                      | 21.00 ± 0.5                 |
| <b>SO<sub>4</sub><sup>2-</sup></b> | 52.50                   | 54.00                      | 54.00                      | 53.50 ± 0.87                |
| <b>CaCO<sub>3</sub></b>            | 200                     | 200                        | 200                        | 200                         |

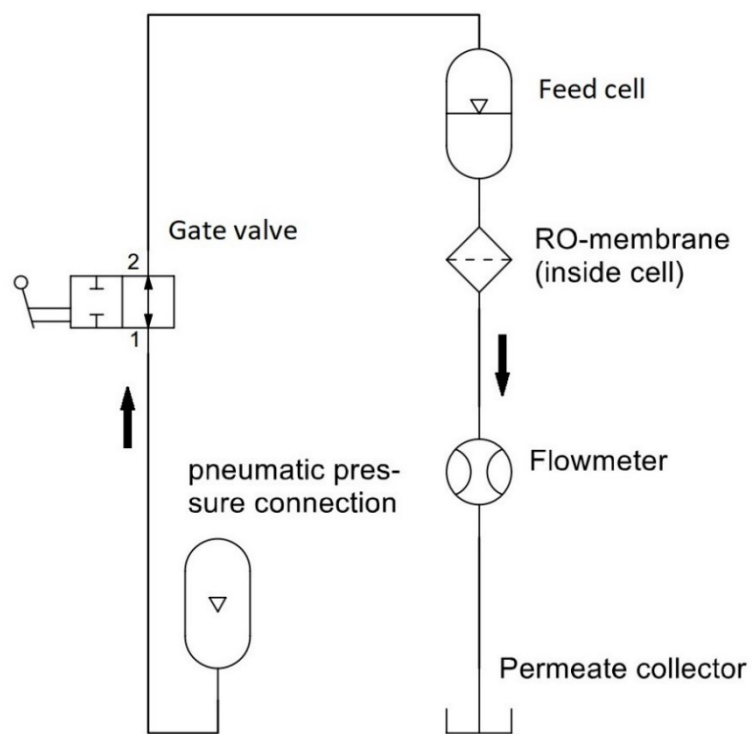

**B) Dead-end RO filtration scheme**

**Figure S1:** Dead-end RO filtration scheme

### **C) QCM-D: coating of the gold-coated sensors with aromatic polyamide layer**

Prior to coating the gold-coated QCM-D crystals with aromatic polyamide, the crystals were treated as following, whereby step i-iii were followed by rinsing with ultrapure water:

(i) Incubation in pure N-Methyl-2-Pyrrolidone overnight, (ii) 5 min immersion in a piranha solution (75°C; 5:1:1 mixture (by volume) of 5 parts ultrapure water, 1 part ammonium hydroxide solution (30%) and 1 part hydrogen peroxide solution (30%)), (iii) 10 min immersion in a solution of pure Dimethylformamide (DMF) solution (75°C), (iv) drying in a jet stream of nitrogen gas (medical grade) and (iv) exposure to UV radiation for 10 minutes in a UV ozone cleaner (Pro cleaner plus, Bioforce Nanoscience, USA).

For spin coating of the gold-coated QCM-D crystals, a solution of 10 mL of DMF containing 2.5% (w/v) lithium chloride was mixed and filtered through a 0.2  $\mu\text{m}$  syringe filter to remove any dust particles. This solution was later used to dissolve 30 mg of NOMEX, linear aromatic polyamide fibers (DuPont, USA) in a 50 mL flask connected to a reflux chamber, where the flask containing DMF and the Nomex material was submerged in a heated oil bath at 90 °C overnight. Then, 45  $\mu\text{L}$  of the polyamide solution was added to the middle point of the sensor rotating at 40 rounds per second (rps). Spin coating rotation time of the sensor was 1 min. Finally, the coated sensor was carefully vacuum-dried for 2 h at 45 °C.

#### D) AFM high resolution topography of the surfaces

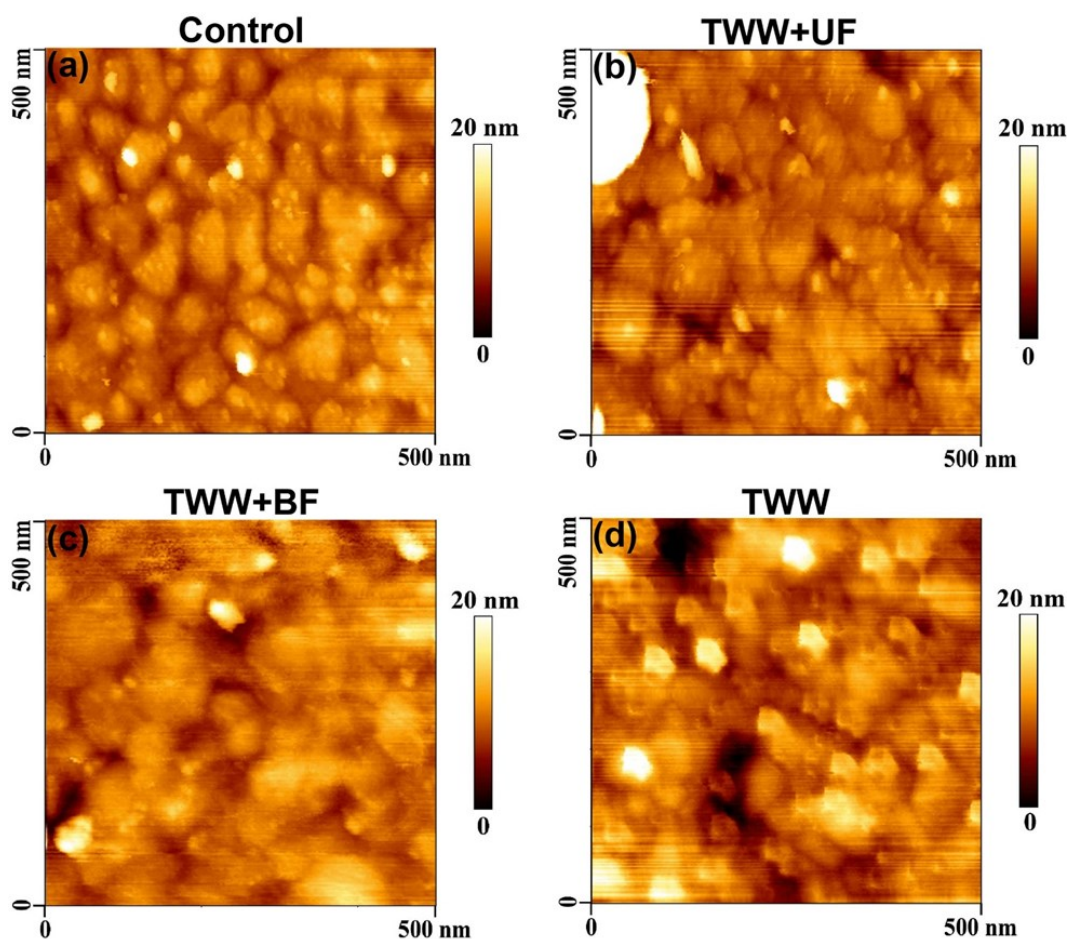

**Figure S2.** High resolution (500 \* 500 nm) AFM topography describing the structural details of different surfaces; (a) Control (ie.: PA coated QCM-D sensor), (b) Ultrafilter pre-treated waste water (TWW+UF), (c) Bioactive filter pre-treated waste water (TWW+BF), (d) Tertiary waste water (TWW)

### E) AFM adhesion micrographs

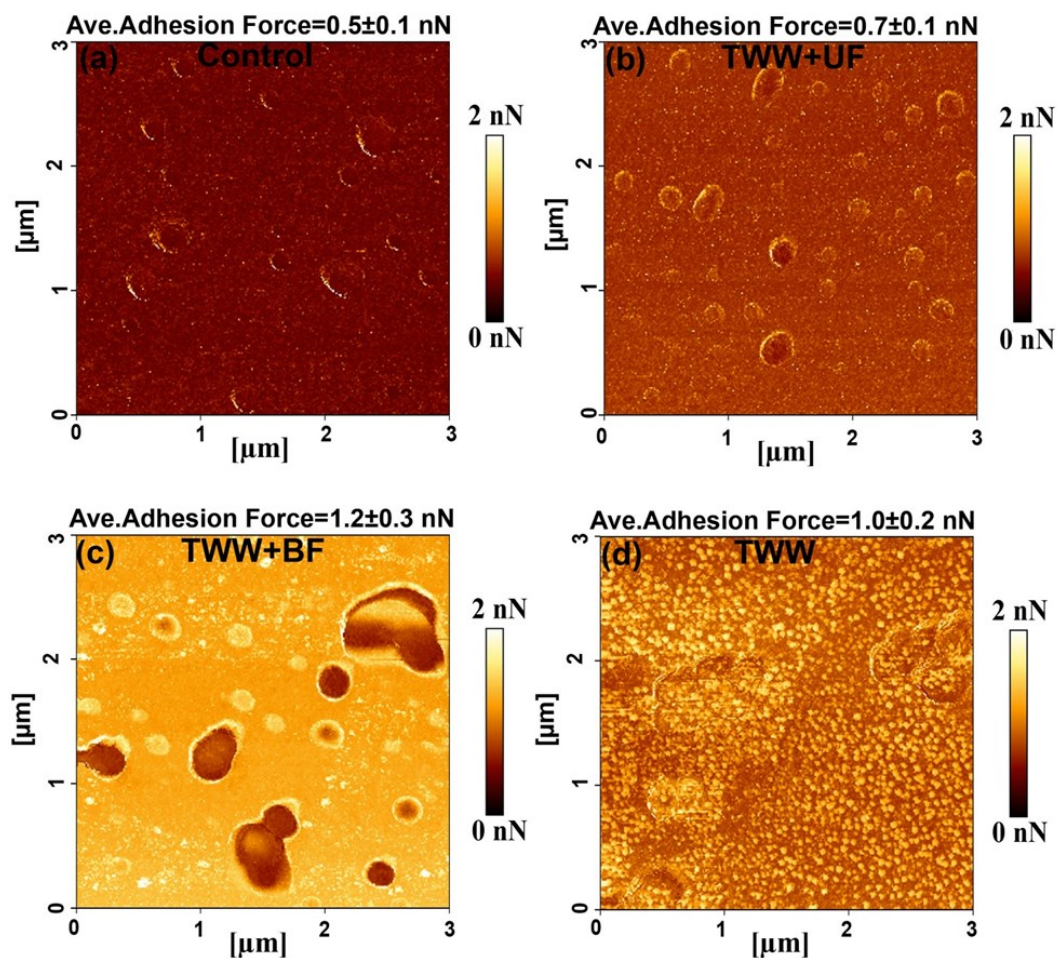

**Figure S3.** AFM adhesion micrographs (using sharp silicon nitride probes with tip radius  $\sim 2$ -12 nm) describing the adhesion intensities for an area of  $3 \times 3 \mu\text{m}$ ; (a) Control (ie.: PA coated QCMD sensor), (b) Ultrafilter pre-treated wastewater (TWW+UF), (c) Bioactive filter pre-treated wastewater (TWW+BF), (d) Tertiary wastewater (TWW)

**F) Chromatograms of the of the fractionated wastewater and recovery of fractionation**

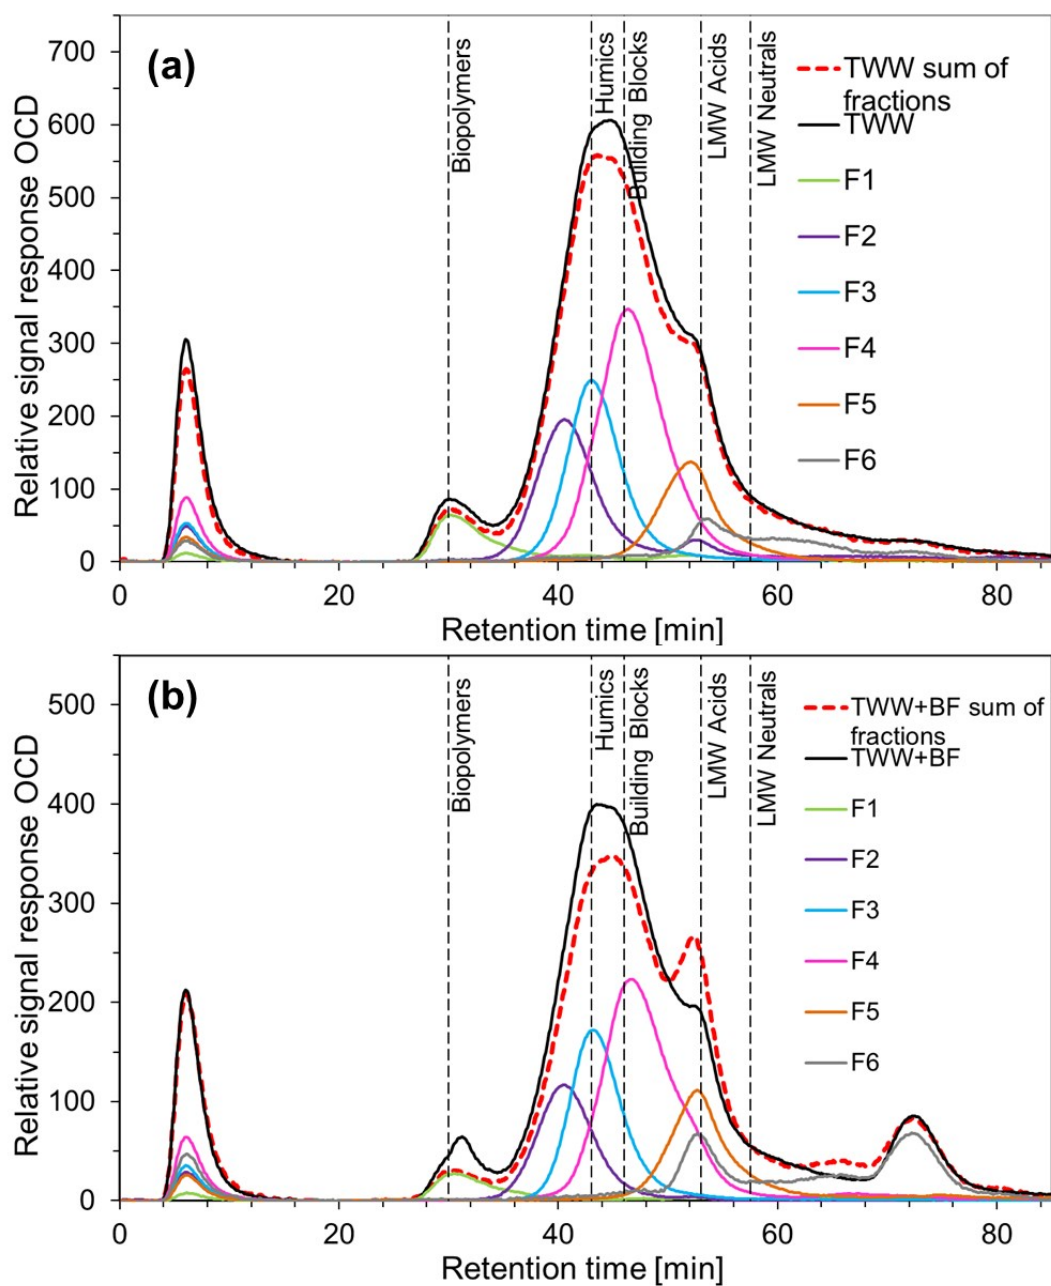

**Figure S4.** Chromatograms of the of the fractionated wastewater and the sum of the fractions as comparison to the original OCD signal (a) Tertiary wastewater (TWW), (b) Biofiltered tertiary wastewater (TWW+BF).

**Table S2:** Recovery rate of tertiary wastewater fractions

|        | Recovery of fractions [%] |
|--------|---------------------------|
| TWW    | 92.4                      |
| TWW+BF | 97.6                      |
| TWW+UF | 102.3                     |
